# Supplementary material
Source: Springer Nature journal article supplement (https://www.springermedizin.de/resource/supplementary/12889_2012_5384_MOESM1_ESM.pdf/9495256)

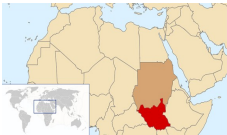

South Sudan.

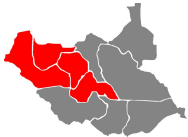

The Greater Bahr al Ghazal region.

Source: wikipedia

Supplement: MOESM1 [file 9495256]
